# Supplementary material
Source: publisher figshare collection journal article supplement (https://tandf.figshare.com/articles/dataset/_/6388880)
Supplement: Supplementary file 1 [file 1]

Table C. Chromite chemistry results

| Sample Mineral                                                       | CP17-111<br>Spinel 1-1 | CP17-111<br>Spinel 1-2 | CP17-111<br>Spinel 3b-1 | CP17-111<br>Spinel 3-1 | CP17-111<br>Spinel 4b-1 | CP17-111<br>Spinel 4b-2 | CP17-111<br>Spinel 4b-3 | CP17-111<br>Spinel 4-1 | CP17-111<br>Spinel 4-2 | CP17-111<br>Spinel 5b-1 | CP17-111<br>Spinel 5b-2 | CP17-111<br>Spinel 13-1 | CP17-111<br>Spinel 13-2 | CP17-113<br>Spinel 11-1 | CP17-113<br>Spinel 10-1 | CP17-105<br>Spinel 7-1 |
|----------------------------------------------------------------------|------------------------|------------------------|-------------------------|------------------------|-------------------------|-------------------------|-------------------------|------------------------|------------------------|-------------------------|-------------------------|-------------------------|-------------------------|-------------------------|-------------------------|------------------------|
| <b>TiO<sub>2</sub> (wt%)</b>                                         | 0.22                   | 0.26                   | 0.29                    | 0.20                   | 0.33                    | 0.33                    | 0.46                    | 0.22                   | 0.26                   | 0.29                    | 0.77                    | 0.19                    | 0.27                    | 0.45                    | 0.26                    | 0.24                   |
| <b>Al<sub>2</sub>O<sub>3</sub></b>                                   | 39.62                  | 41.61                  | 36.02                   | 28.45                  | 49.39                   | 47.06                   | 38.65                   | 45.31                  | 32.58                  | 46.80                   | 45.58                   | 48.40                   | 39.76                   | 43.18                   | 44.82                   | 28.96                  |
| <b>Cr<sub>2</sub>O<sub>3</sub></b>                                   | 25.86                  | 22.29                  | 29.42                   | 37.85                  | 14.17                   | 17.06                   | 27.36                   | 19.05                  | 32.13                  | 17.04                   | 18.43                   | 16.45                   | 26.76                   | 20.90                   | 20.06                   | 38.79                  |
| <b>Fe<sub>2</sub>O<sub>3</sub><sup>a</sup></b>                       | 4.07                   | 5.88                   | 3.92                    | 3.60                   | 4.55                    | 3.98                    | 3.29                    | 4.83                   | 5.07                   | 4.33                    | 3.63                    | 4.59                    | 3.83                    | 3.25                    | 4.67                    | 3.20                   |
| <b>FeO</b>                                                           | 10.92                  | 10.72                  | 13.38                   | 15.06                  | 10.04                   | 10.07                   | 11.53                   | 9.41                   | 14.33                  | 10.46                   | 10.58                   | 10.59                   | 11.50                   | 10.86                   | 9.74                    | 13.20                  |
| <b>V<sub>2</sub>O<sub>5</sub></b>                                    | 0.17                   | 0.19                   | 0.27                    | 0.38                   | 0.21                    | 0.23                    | 0.25                    | 0.22                   | 0.31                   | 0.15                    | 0.23                    | 0.22                    | 0.20                    | 0.24                    | 0.21                    | 0.29                   |
| <b>MnO</b>                                                           | 0.17                   | 0.18                   | 0.20                    | 0.22                   | 0.12                    | 0.15                    | 0.18                    | 0.17                   | 0.24                   | 0.18                    | 0.16                    | 0.16                    | 0.21                    | 0.15                    | 0.15                    | 0.18                   |
| <b>MgO</b>                                                           | 17.55                  | 17.98                  | 15.76                   | 13.98                  | 19.02                   | 18.74                   | 17.29                   | 19.00                  | 14.87                  | 18.37                   | 18.55                   | 18.79                   | 17.49                   | 17.72                   | 18.93                   | 15.37                  |
| <b>ZnO</b>                                                           | 0.18                   | 0.24                   | 0.20                    | 0.11                   | 0.31                    | 0.25                    | 0.20                    | 0.30                   | 0.13                   | 0.30                    | 0.29                    | 0.30                    | 0.20                    | 0.23                    | 0.26                    | 0.14                   |
| <b>Total</b>                                                         | 98.8                   | 99.4                   | 99.5                    | 99.9                   | 98.2                    | 97.9                    | 99.2                    | 98.5                   | 99.9                   | 98.0                    | 98.2                    | 99.7                    | 100.2                   | 97.0                    | 99.2                    | 100.4                  |
| <i>Atoms per formula unit calculated on the basis of 4 oxygens</i>   |                        |                        |                         |                        |                         |                         |                         |                        |                        |                         |                         |                         |                         |                         |                         |                        |
| <b>Al</b>                                                            | 1.32                   | 1.37                   | 1.22                    | 1                      | 1.58                    | 1.53                    | 1.29                    | 1.47                   | 1.12                   | 1.52                    | 1.48                    | 1.54                    | 1.31                    | 1.44                    | 1.45                    | 1                      |
| <b>Cr</b>                                                            | 0.58                   | 0.49                   | 0.67                    | 0.9                    | 0.3                     | 0.37                    | 0.61                    | 0.41                   | 0.74                   | 0.37                    | 0.4                     | 0.35                    | 0.59                    | 0.47                    | 0.43                    | 0.9                    |
| <b>Fe<sup>3+</sup></b>                                               | 0.09                   | 0.12                   | 0.08                    | 0.08                   | 0.09                    | 0.08                    | 0.07                    | 0.1                    | 0.11                   | 0.09                    | 0.07                    | 0.09                    | 0.08                    | 0.07                    | 0.1                     | 0.07                   |
| <b>Mg</b>                                                            | 0.74                   | 0.75                   | 0.68                    | 0.62                   | 0.77                    | 0.77                    | 0.73                    | 0.78                   | 0.65                   | 0.75                    | 0.76                    | 0.76                    | 0.73                    | 0.75                    | 0.77                    | 0.67                   |
| <b>Fe<sup>2+</sup></b>                                               | 0.26                   | 0.25                   | 0.32                    | 0.38                   | 0.23                    | 0.23                    | 0.27                    | 0.22                   | 0.35                   | 0.24                    | 0.24                    | 0.24                    | 0.27                    | 0.26                    | 0.22                    | 0.32                   |
| <b>Cr<sup>#</sup><sup>b</sup></b>                                    | 30                     | 0.26                   | 0.35                    | 0.47                   | 0.16                    | 0.19                    | 0.32                    | 0.22                   | 0.4                    | 0.2                     | 0.21                    | 0.19                    | 0.31                    | 0.24                    | 0.23                    | 0.47                   |
| <b>Mg<sup>#</sup><sup>c</sup></b>                                    | 0.74                   | 0.75                   | 0.68                    | 0.62                   | 0.77                    | 0.77                    | 0.73                    | 0.78                   | 0.65                   | 0.76                    | 0.76                    | 0.76                    | 0.73                    | 0.74                    | 0.78                    | 0.67                   |
| <b>Fe<sup>3+</sup>/(Fe<sup>3+</sup>+Fe<sup>2+</sup>)<sup>d</sup></b> | 0.04                   | 0.06                   | 0.04                    | 0.04                   | 0.05                    | 0.04                    | 0.03                    | 0.05                   | 0.06                   | 0.044                   | 0.04                    | 0.05                    | 0.04                    | 0.03                    | 0.05                    | 0.04                   |

<sup>a</sup> Fe<sub>2</sub>O<sub>3</sub> contents of chromite were computed assuming R<sub>3</sub>O<sub>4</sub> stoichiometry and charge balance. <sup>b</sup> Cr# [Cr/(Cr+Al) atomic ratio]. <sup>c</sup> Mg# [Mg/(Mg+Fe<sup>2+</sup>) atomic ratio]. <sup>d</sup> Fe<sup>3+</sup># [Fe<sup>3+</sup>/(Fe<sup>3+</sup>+Al+Cr) in atomic ratio].
