# Supplementary material
Source: publisher figshare collection journal article supplement (https://tandf.figshare.com/articles/dataset/_/6388880)
Supplement: Supplementary file 2 [file 1]

**Table D. Garnet Chemistry results**[illegible]
