# Supplementary material
Source: publisher figshare collection journal article supplement (https://tandf.figshare.com/articles/dataset/_/6388880)
Supplement: Supplementary file 3 [file 1]

**Table B: Point-counting raw data and recalculated parameters for sandstones of the Cerro Pelón area**

| Point-counting proportions |             |             |             |             |             |             |             |            |             |            |            |             |             |             |             |             |             |             |
|----------------------------|-------------|-------------|-------------|-------------|-------------|-------------|-------------|------------|-------------|------------|------------|-------------|-------------|-------------|-------------|-------------|-------------|-------------|
| <i>Sample</i>              | <i>Qs</i>   | <i>QRm</i>  | <i>QRi</i>  | <i>QLyf</i> | <i>Qp</i>   | <i>Ks</i>   | <i>KRm</i>  | <i>KRi</i> | <i>Ps</i>   | <i>PRm</i> | <i>PRi</i> | <i>PLvl</i> | <i>Lmf1</i> | <i>Lmf2</i> | <i>Lmf3</i> | <i>Lmf4</i> | <i>Lmf5</i> | <i>Lmf?</i> |
| CP17-105                   | 76          | 32          | 3           | 0           | 5           | 42          | 2           | 2          | 30          | 0          | 2          | 1           | 1           | 17          | 21          | 4           | 1           | 0           |
| CP17-106                   | 71          | 28          | 2           | 0           | 3           | 47          | 7           | 2          | 24          | 7          | 3          | 2           | 1           | 15          | 19          | 2           | 2           | 2           |
| CP17-104                   | 84          | 69          | 1           | 0           | 2           | 42          | 5           | 2          | 51          | 11         | 6          | 1           | 7           | 43          | 24          | 0           | 0           | 4           |
| CP17-107                   | 76          | 26          | 3           | 0           | 2           | 59          | 2           | 3          | 48          | 2          | 2          | 0           | 2           | 11          | 13          | 1           | 0           | 3           |
| CP17-103                   | 78          | 31          | 0           | 1           | 7           | 38          | 1           | 0          | 28          | 1          | 0          | 0           | 2           | 13          | 12          | 4           | 0           | 7           |
| CP17-110                   | 93          | 28          | 2           | 0           | 6           | 30          | 2           | 2          | 41          | 0          | 0          | 0           | 0           | 16          | 17          | 3           | 0           | 8           |
| CP17-100                   | 97          | 20          | 1           | 0           | 4           | 38          | 1           | 0          | 30          | 0          | 0          | 0           | 1           | 25          | 21          | 1           | 0           | 10          |
| CP17-101                   | 101         | 17          | 0           | 0           | 1           | 42          | 0           | 0          | 35          | 0          | 0          | 0           | 0           | 23          | 29          | 4           | 0           | 8           |
| CP17-113                   | 95          | 11          | 1           | 0           | 5           | 39          | 0           | 0          | 42          | 0          | 0          | 0           | 1           | 17          | 32          | 2           | 0           | 5           |
| CP17-111                   | 114         | 7           | 0           | 0           | 0           | 48          | 0           | 0          | 39          | 0          | 0          | 0           | 0           | 25          | 28          | 2           | 0           | 11          |
|                            |             |             |             |             |             |             |             |            |             |            |            |             |             |             |             |             |             |             |
| <i>Sample</i>              | <i>Lmp2</i> | <i>Lmp3</i> | <i>Lmp4</i> | <i>Lmb1</i> | <i>Lmb2</i> | <i>Lmb3</i> | <i>Lmb4</i> | <i>Lvl</i> | <i>Lvmi</i> | <i>Lyf</i> | <i>Lss</i> | <i>Lsc</i>  | <i>Lu</i>   | <i>H</i>    | <i>Und.</i> | <i>TOT</i>  |             |             |
| CP17-105                   | 0           | 12          | 1           | 0           | 2           | 0           | 0           | 11         | 7           | 10         | 9          | 12          | 6           | 2           | 0           |             |             | 311         |
| CP17-106                   | 1           | 6           | 0           | 0           | 2           | 0           | 1           | 4          | 4           | 7          | 9          | 8           | 10          | 4           | 6           |             |             | 299         |
| CP17-104                   | 5           | 8           | 0           | 0           | 1           | 0           | 0           | 11         | 3           | 10         | 13         | 7           | 3           | 1           | 5           |             |             | 419         |
| CP17-107                   | 3           | 5           | 4           | 0           | 3           | 0           | 0           | 5          | 3           | 5          | 4          | 5           | 2           | 1           | 6           |             |             | 299         |
| CP17-103                   | 1           | 9           | 1           | 6           | 0           | 1           | 0           | 9          | 7           | 16         | 4          | 4           | 4           | 1           | 7           |             |             | 293         |
| CP17-110                   | 1           | 8           | 1           | 1           | 1           | 0           | 0           | 4          | 3           | 6          | 3          | 9           | 7           | 4           | 9           |             |             | 305         |
| CP17-100                   | 2           | 9           | 0           | 0           | 2           | 0           | 0           | 11         | 4           | 7          | 3          | 4           | 7           | 5           | 5           |             |             | 308         |
| CP17-101                   | 3           | 10          | 0           | 1           | 2           | 0           | 0           | 11         | 6           | 12         | 4          | 7           | 9           | 1           | 11          |             |             | 337         |
| CP17-113                   | 1           | 15          | 1           | 0           | 3           | 0           | 1           | 9          | 4           | 17         | 4          | 6           | 13          | 1           | 9           |             |             | 334         |
| CP17-111                   | 2           | 10          | 1           | 1           | 2           | 0           | 0           | 7          | 2           | 13         | 3          | 5           | 7           | 1           | 15          |             |             | 343         |
