# Supplementary material
Source: publisher figshare collection journal article supplement (https://tandf.figshare.com/articles/dataset/_/6388880)
Supplement: Supplementary file 4 [file 1]

Table E. U-Pb Geochronology results

| CP17/2-104    | X<br>409480          |                       | Y<br>1944515 |                                      | CORRECTED RATIOS <sup>2</sup> |                                     |         |                                     |         |                                      |         |        | CORRECTED AGES (Ma)                 |            |                                     |     |                                      |     |              |
|---------------|----------------------|-----------------------|--------------|--------------------------------------|-------------------------------|-------------------------------------|---------|-------------------------------------|---------|--------------------------------------|---------|--------|-------------------------------------|------------|-------------------------------------|-----|--------------------------------------|-----|--------------|
|               | U (ppm) <sup>1</sup> | Th (ppm) <sup>1</sup> | Th/U         | <sup>207</sup> Pb/ <sup>206</sup> Pb | ±2s abs                       | <sup>207</sup> Pb/ <sup>235</sup> U | ±2s abs | <sup>206</sup> Pb/ <sup>238</sup> U | ±2s abs | <sup>208</sup> Pb/ <sup>232</sup> Th | ±2s abs | Rho    | <sup>206</sup> Pb/ <sup>238</sup> U | ±2s        | <sup>207</sup> Pb/ <sup>235</sup> U | ±2s | <sup>207</sup> Pb/ <sup>206</sup> Pb | ±2s | Disc%        |
| Zircon_01_104 | 109.2                | 31.2                  | 0.29         | 0.0721                               | 0.0028                        | 1.5940                              | 0.0730  | 0.1599                              | 0.0038  | 0.0517                               | 0.0031  | 0.388  | <b>956</b>                          | <b>21</b>  | 966                                 | 29  | 972                                  | 81  | 1.04         |
| Zircon_02     | 113.3                | 82.8                  | 0.73         | 0.0499                               | 0.0042                        | 0.2860                              | 0.0230  | 0.0412                              | 0.0013  | 0.0141                               | 0.0009  | -0.041 | <b>260</b>                          | <b>8</b>   | 254                                 | 19  | 170                                  | 180 | -2.36        |
| Zircon_03     | 479                  | 150.4                 | 0.31         | 0.0789                               | 0.0029                        | 2.1000                              | 0.1000  | 0.1905                              | 0.0038  | 0.0637                               | 0.0053  | 0.592  | <b>1124</b>                         | <b>21</b>  | 1147                                | 30  | 1177                                 | 71  | 2.01         |
| Zircon_04     | 813                  | 442                   | 0.54         | 0.0473                               | 0.0045                        | 0.0273                              | 0.0025  | 0.0041                              | 0.0001  | 0.0014                               | 0.0001  | -0.002 | <b>26.49</b>                        | <b>0.8</b> | 27.4                                | 2.4 | 120                                  | 190 | 3.32         |
| Zircon_05     | 176.2                | 182.2                 | 1.03         | 0.0537                               | 0.0028                        | 0.3000                              | 0.0180  | 0.0410                              | 0.0010  | 0.0127                               | 0.0007  | 0.115  | <b>259</b>                          | <b>6.2</b> | 269                                 | 15  | 350                                  | 110 | 3.72         |
| Zircon_06     | 258.1                | 170.7                 | 0.66         | 0.0540                               | 0.0023                        | 0.2820                              | 0.0130  | 0.0375                              | 0.0008  | 0.0127                               | 0.0006  | -0.179 | <b>237.4</b>                        | <b>5</b>   | 252                                 | 10  | 370                                  | 92  | 5.79         |
| Zircon_07     | 87.1                 | 22.9                  | 0.26         | 0.0726                               | 0.0026                        | 1.7170                              | 0.0770  | 0.1712                              | 0.0038  | 0.0581                               | 0.0035  | 0.196  | <b>1019</b>                         | <b>21</b>  | 1012                                | 29  | 1001                                 | 78  | -0.69        |
| Zircon_08     | 67.9                 | 28.6                  | 0.42         | 0.0560                               | 0.0120                        | 0.0950                              | 0.0190  | 0.0134                              | 0.0007  | 0.0041                               | 0.0008  | 0.157  | <b>85.7</b>                         | <b>4.7</b> | 90                                  | 17  | 200                                  | 380 | 4.78         |
| Zircon_09     | 45.6                 | 17.4                  | 0.38         | 0.0786                               | 0.0040                        | 1.8370                              | 0.0960  | 0.1699                              | 0.0044  | 0.0569                               | 0.0042  | 0.242  | <b>1011</b>                         | <b>24</b>  | 1069                                | 36  | 1175                                 | 99  | 5.43         |
| Zircon_10     | 235.8                | 176.9                 | 0.75         | 0.0509                               | 0.0028                        | 0.2810                              | 0.0160  | 0.0405                              | 0.0010  | 0.0126                               | 0.0007  | 0.212  | <b>255.6</b>                        | <b>5.9</b> | 250                                 | 13  | 210                                  | 120 | -2.24        |
| Zircon_11     | 473                  | 161.9                 | 0.34         | 0.0538                               | 0.0060                        | 0.0338                              | 0.0036  | 0.0045                              | 0.0002  | 0.0017                               | 0.0002  | -0.043 | <b>29</b>                           | <b>1.1</b> | 33.7                                | 3.6 | 370                                  | 220 | 13.95        |
| Zircon_12     | 164                  | 79.7                  | 0.49         | 0.0746                               | 0.0027                        | 1.7880                              | 0.0710  | 0.1729                              | 0.0038  | 0.0532                               | 0.0024  | 0.002  | <b>1028</b>                         | <b>21</b>  | 1040                                | 26  | 1045                                 | 71  | 1.15         |
| Zircon_13     | 97                   | 48.8                  | 0.50         | 0.0548                               | 0.0050                        | 0.2920                              | 0.0320  | 0.0386                              | 0.0013  | 0.0141                               | 0.0012  | -0.166 | <b>244.4</b>                        | <b>7.8</b> | 258                                 | 24  | 340                                  | 180 | 5.27         |
| Zircon_14     | 209.1                | 160                   | 0.77         | 0.0580                               | 0.0110                        | 0.0378                              | 0.0068  | 0.0049                              | 0.0002  | 0.0019                               | 0.0002  | 0.225  | <b>31.2</b>                         | <b>1.3</b> | 37.4                                | 6.9 | 510                                  | 330 | <b>16.58</b> |
| Zircon_15     | 163.6                | 43.5                  | 0.27         | 0.0723                               | 0.0024                        | 1.6880                              | 0.0700  | 0.1705                              | 0.0037  | 0.0501                               | 0.0027  | 0.319  | <b>1015</b>                         | <b>20</b>  | 1013                                | 25  | 997                                  | 70  | -0.20        |
| Zircon_16     | 270                  | 247                   | 0.91         | 0.0570                               | 0.0120                        | 0.0390                              | 0.0110  | 0.0048                              | 0.0003  | 0.0018                               | 0.0003  | -0.303 | <b>30.6</b>                         | <b>1.6</b> | 38                                  | 11  | 410                                  | 360 | <b>19.47</b> |
| Zircon_17     | 202.3                | 55.9                  | 0.28         | 0.0502                               | 0.0045                        | 0.1300                              | 0.0110  | 0.0192                              | 0.0006  | 0.0057                               | 0.0006  | -0.104 | <b>122.3</b>                        | <b>3.8</b> | 123.5                               | 9.7 | 210                                  | 190 | 0.97         |
| Zircon_18     | 1650                 | 633                   | 0.38         | 0.0482                               | 0.0026                        | 0.0300                              | 0.0017  | 0.0046                              | 0.0001  | 0.0015                               | 0.0001  | -0.085 | <b>29.43</b>                        | <b>0.8</b> | 30                                  | 1.7 | 110                                  | 120 | 1.90         |
| Zircon_19     | 1240                 | 461                   | 0.37         | 0.0478                               | 0.0042                        | 0.0317                              | 0.0026  | 0.0047                              | 0.0002  | 0.0015                               | 0.0002  | 0.074  | <b>29.94</b>                        | <b>0.9</b> | 31.7                                | 2.6 | 100                                  | 160 | 5.55         |
| Zircon_20     | 259.7                | 110                   | 0.42         | 0.0728                               | 0.0022                        | 1.7070                              | 0.0650  | 0.1711                              | 0.0033  | 0.0520                               | 0.0024  | 0.225  | <b>1018</b>                         | <b>18</b>  | 1012                                | 24  | 1007                                 | 63  | -0.59        |
| Zircon_21     | 261.1                | 111.1                 | 0.43         | 0.0756                               | 0.0023                        | 1.8010                              | 0.0660  | 0.1723                              | 0.0036  | 0.0514                               | 0.0023  | 0.179  | <b>1025</b>                         | <b>20</b>  | 1045                                | 24  | 1088                                 | 61  | 1.91         |
| Zircon_22     | 32.8                 | 27                    | 0.82         | 0.0463                               | 0.0075                        | 0.2640                              | 0.0440  | 0.0406                              | 0.0023  | 0.0129                               | 0.0015  | 0.185  | <b>257</b>                          | <b>14</b>  | 232                                 | 36  | 20                                   | 320 | -10.78       |
| Zircon_23     | 88.8                 | 63.9                  | 0.72         | 0.0540                               | 0.0052                        | 0.3010                              | 0.0270  | 0.0414                              | 0.0014  | 0.0133                               | 0.0009  | -0.231 | <b>262.7</b>                        | <b>9</b>   | 265                                 | 21  | 310                                  | 210 | 0.87         |
| Zircon_24     | 174.7                | 33.83                 | 0.19         | 0.0706                               | 0.0027                        | 1.5760                              | 0.0840  | 0.1632                              | 0.0047  | 0.0513                               | 0.0028  | 0.022  | <b>975</b>                          | <b>25</b>  | 959                                 | 31  | 942                                  | 76  | -1.67        |
| Zircon_25     | 189.4                | 111.1                 | 0.59         | 0.0803                               | 0.0026                        | 2.2780                              | 0.0880  | 0.2077                              | 0.0044  | 0.0626                               | 0.0028  | 0.019  | <b>1216</b>                         | <b>23</b>  | 1207                                | 26  | 1197                                 | 63  | -0.75        |
| Zircon_26     | 321                  | 24.4                  | 0.08         | 0.0631                               | 0.0031                        | 0.8110                              | 0.0900  | 0.0927                              | 0.0062  | 0.0752                               | 0.0032  | 0.129  | <b>574</b>                          | <b>35</b>  | 602                                 | 43  | 693                                  | 86  | 4.65         |
| Zircon_27     | 427                  | 146.4                 | 0.34         | 0.0870                               | 0.0023                        | 2.7450                              | 0.0960  | 0.2293                              | 0.0045  | 0.0692                               | 0.0032  | 0.152  | <b>1331</b>                         | <b>24</b>  | 1340                                | 26  | 1362                                 | 50  | 0.67         |
| Zircon_28     | 75.7                 | 29.9                  | 0.39         | 0.0687                               | 0.0033                        | 1.5100                              | 0.0810  | 0.1592                              | 0.0038  | 0.0504                               | 0.0032  | 0.277  | <b>952</b>                          | <b>21</b>  | 940                                 | 34  | 890                                  | 100 | -1.28        |
| Zircon_29     | 838                  | 647                   | 0.77         | 0.0505                               | 0.0020                        | 0.2750                              | 0.0130  | 0.0396                              | 0.0008  | 0.0125                               | 0.0005  | 0.312  | <b>250.3</b>                        | <b>5.2</b> | 247                                 | 10  | 213                                  | 91  | -1.34        |
| Zircon_30     | 580                  | 835                   | 1.44         | 0.0532                               | 0.0045                        | 0.2730                              | 0.0250  | 0.0372                              | 0.0009  | 0.0120                               | 0.0006  | 0.038  | <b>235.2</b>                        | <b>5.8</b> | 244                                 | 19  | 340                                  | 160 | 3.61         |
| Zircon_31     | 286.5                | 76.2                  | 0.27         | 0.0722                               | 0.0020                        | 1.6850                              | 0.0610  | 0.1695                              | 0.0033  | 0.0509                               | 0.0024  | 0.395  | <b>1009</b>                         | <b>17</b>  | 1004                                | 24  | 1005                                 | 53  | -0.50        |
| Zircon_32     | 404                  | 259                   | 0.64         | 0.0523                               | 0.0028                        | 0.2980                              | 0.0230  | 0.0425                              | 0.0017  | 0.0130                               | 0.0013  | 0.366  | <b>268</b>                          | <b>10</b>  | 264                                 | 19  | 270                                  | 120 | -1.52        |
| Zircon_33     | 411                  | 169                   | 0.41         | 0.0804                               | 0.0021                        | 2.1140                              | 0.0740  | 0.1917                              | 0.0041  | 0.0583                               | 0.0026  | 0.467  | <b>1130</b>                         | <b>22</b>  | 1153                                | 25  | 1213                                 | 47  | 1.99         |
| Zircon_34     | 1489                 | 504                   | 0.34         | 0.0467                               | 0.0033                        | 0.0274                              | 0.0019  | 0.0043                              | 0.0001  | 0.0014                               | 0.0001  | 0.048  | <b>27.44</b>                        | <b>0.9</b> | 27.4                                | 1.9 | 120                                  | 150 | -0.15        |

|           |       |       |      |        |        |        |        |        |        |        |        |        |              |            |      |     |      |     |               |
|-----------|-------|-------|------|--------|--------|--------|--------|--------|--------|--------|--------|--------|--------------|------------|------|-----|------|-----|---------------|
| Zircon_35 | 404   | 137.9 | 0.34 | 0.0747 | 0.0022 | 1.8560 | 0.0680 | 0.1798 | 0.0034 | 0.0550 | 0.0025 | 0.463  | <b>1066</b>  | <b>19</b>  | 1068 | 24  | 1061 | 57  | 0.19          |
| Zircon_36 | 47.1  | 43.3  | 0.92 | 0.0508 | 0.0050 | 0.2620 | 0.0290 | 0.0390 | 0.0016 | 0.0125 | 0.0010 | 0.139  | <b>246.5</b> | <b>9.9</b> | 233  | 23  | 220  | 200 | -5.79         |
| Zircon_37 | 54    | 37.8  | 0.70 | 0.0591 | 0.0068 | 0.3210 | 0.0350 | 0.0398 | 0.0013 | 0.0136 | 0.0011 | 0.035  | <b>251.3</b> | <b>8.2</b> | 281  | 26  | 560  | 220 | 10.57         |
| Zircon_38 | 105   | 52.2  | 0.50 | 0.0709 | 0.0029 | 1.5510 | 0.0690 | 0.1577 | 0.0033 | 0.0468 | 0.0023 | -0.009 | <b>946</b>   | <b>18</b>  | 949  | 27  | 949  | 80  | 0.32          |
| Zircon_39 | 33    | 28.97 | 0.88 | 0.0591 | 0.0058 | 0.8130 | 0.0720 | 0.1027 | 0.0039 | 0.0331 | 0.0022 | 0.04   | <b>630</b>   | <b>23</b>  | 606  | 41  | 470  | 210 | -3.96         |
| Zircon_40 | 55    | 43    | 0.78 | 0.0660 | 0.0110 | 0.7700 | 0.1100 | 0.0907 | 0.0051 | 0.0317 | 0.0032 | -0.204 | <b>559</b>   | <b>30</b>  | 589  | 58  | 640  | 310 | 5.09          |
| Zircon_41 | 133.2 | 104.6 | 0.79 | 0.0665 | 0.0031 | 1.2370 | 0.0580 | 0.1363 | 0.0031 | 0.0424 | 0.0020 | -0.29  | <b>823</b>   | <b>18</b>  | 818  | 28  | 810  | 99  | -0.61         |
| Zircon_42 | 64.4  | 23.1  | 0.36 | 0.0806 | 0.0040 | 1.9400 | 0.1100 | 0.1749 | 0.0039 | 0.0636 | 0.0044 | 0.137  | <b>1039</b>  | <b>21</b>  | 1091 | 39  | 1217 | 97  | 4.77          |
| Zircon_43 | 236.5 | 97.4  | 0.41 | 0.0690 | 0.0120 | 0.0385 | 0.0067 | 0.0041 | 0.0002 | 0.0017 | 0.0003 | -0.097 | <b>26.2</b>  | <b>1.5</b> | 38.1 | 6.6 | 760  | 320 | 31.23         |
| Zircon_44 | 52.3  | 41.5  | 0.79 | 0.0526 | 0.0083 | 0.3020 | 0.0400 | 0.0407 | 0.0017 | 0.0122 | 0.0012 | -0.311 | <b>257</b>   | <b>11</b>  | 268  | 31  | 260  | 280 | 4.10          |
| Zircon_45 | 85.9  | 77.7  | 0.90 | 0.0548 | 0.0070 | 0.3030 | 0.0370 | 0.0408 | 0.0013 | 0.0135 | 0.0008 | -0.132 | <b>258</b>   | <b>7.9</b> | 264  | 29  | 250  | 250 | 2.27          |
| Zircon_46 | 216.4 | 123.4 | 0.57 | 0.0509 | 0.0024 | 0.3040 | 0.0150 | 0.0436 | 0.0010 | 0.0140 | 0.0008 | 0.197  | <b>275.3</b> | <b>6</b>   | 271  | 12  | 240  | 110 | -1.59         |
| Zircon_47 | 56.3  | 51.1  | 0.91 | 0.0555 | 0.0068 | 0.3030 | 0.0370 | 0.0404 | 0.0017 | 0.0136 | 0.0012 | 0.09   | <b>255</b>   | <b>11</b>  | 269  | 28  | 380  | 250 | 5.20          |
| Zircon_48 | 107.7 | 64.7  | 0.60 | 0.0521 | 0.0037 | 0.2780 | 0.0220 | 0.0395 | 0.0011 | 0.0123 | 0.0009 | 0.171  | <b>250.7</b> | <b>6.7</b> | 250  | 18  | 270  | 150 | -0.28         |
| Zircon_49 | 205.6 | 31.08 | 0.15 | 0.0708 | 0.0024 | 1.5160 | 0.0660 | 0.1564 | 0.0038 | 0.0471 | 0.0028 | 0.509  | <b>937</b>   | <b>21</b>  | 939  | 26  | 961  | 70  | 0.21          |
| Zircon_50 | 144.6 | 65.8  | 0.46 | 0.0490 | 0.0110 | 0.0281 | 0.0057 | 0.0043 | 0.0003 | 0.0012 | 0.0003 | -0.169 | <b>27.9</b>  | <b>1.8</b> | 28   | 5.4 | 190  | 360 | 0.36          |
| Zircon_52 | 791   | 471   | 0.60 | 0.0486 | 0.0038 | 0.0285 | 0.0023 | 0.0042 | 0.0002 | 0.0014 | 0.0001 | 0.05   | <b>27.23</b> | <b>1</b>   | 28.5 | 2.3 | 90   | 170 | 4.46          |
| Zircon_53 | 68.9  | 34.6  | 0.50 | 0.0793 | 0.0031 | 2.1900 | 0.1100 | 0.1999 | 0.0044 | 0.0599 | 0.0033 | 0.185  | <b>1174</b>  | <b>24</b>  | 1186 | 32  | 1185 | 83  | 1.01          |
| Zircon_54 | 171.4 | 156   | 0.91 | 0.0524 | 0.0036 | 0.2730 | 0.0200 | 0.0387 | 0.0010 | 0.0123 | 0.0007 | 0.086  | <b>244.9</b> | <b>6.5</b> | 247  | 16  | 280  | 140 | 0.85          |
| Zircon_55 | 291   | 72.2  | 0.25 | 0.0792 | 0.0024 | 2.2540 | 0.0810 | 0.2052 | 0.0043 | 0.0596 | 0.0029 | 0.192  | <b>1203</b>  | <b>23</b>  | 1197 | 25  | 1178 | 58  | -0.50         |
| Zircon_56 | 18.9  | 19.02 | 1.01 | 0.0650 | 0.0130 | 0.3330 | 0.0650 | 0.0382 | 0.0021 | 0.0128 | 0.0015 | 0.059  | <b>242</b>   | <b>13</b>  | 289  | 48  | 520  | 410 | <b>16.26</b>  |
| Zircon_57 | 56.6  | 23.9  | 0.42 | 0.0703 | 0.0045 | 1.4630 | 0.0920 | 0.1546 | 0.0044 | 0.0444 | 0.0030 | 0.042  | <b>927</b>   | <b>24</b>  | 920  | 40  | 920  | 130 | -0.76         |
| Zircon_58 | 166   | 84.6  | 0.51 | 0.0838 | 0.0025 | 2.6850 | 0.0960 | 0.2303 | 0.0044 | 0.0691 | 0.0031 | 0.097  | <b>1336</b>  | <b>23</b>  | 1323 | 28  | 1285 | 59  | -0.98         |
| Zircon_59 | 122.4 | 42.3  | 0.35 | 0.0812 | 0.0042 | 2.2500 | 0.1500 | 0.2036 | 0.0052 | 0.0614 | 0.0041 | 0.782  | <b>1194</b>  | <b>28</b>  | 1196 | 44  | 1239 | 98  | 0.17          |
| Zircon_60 | 310   | 109.8 | 0.35 | 0.0760 | 0.0023 | 1.8820 | 0.0760 | 0.1794 | 0.0043 | 0.0573 | 0.0027 | 0.323  | <b>1064</b>  | <b>24</b>  | 1077 | 27  | 1088 | 60  | 1.21          |
| Zircon_61 | 43.8  | 19.8  | 0.45 | 0.0521 | 0.0079 | 0.2790 | 0.0380 | 0.0377 | 0.0014 | 0.0124 | 0.0018 | -0.163 | <b>238.7</b> | <b>8.6</b> | 244  | 30  | 240  | 270 | 2.17          |
| Zircon_62 | 130.8 | 85.3  | 0.65 | 0.0310 | 0.0110 | 0.0223 | 0.0078 | 0.0050 | 0.0003 | 0.0016 | 0.0002 | 0.067  | <b>32.4</b>  | <b>2.1</b> | 22.1 | 7.7 | -630 | 460 | <b>-46.61</b> |
| Zircon_63 | 165.9 | 52.1  | 0.31 | 0.0812 | 0.0023 | 2.3680 | 0.0890 | 0.2111 | 0.0048 | 0.0637 | 0.0030 | 0.409  | <b>1234</b>  | <b>26</b>  | 1235 | 27  | 1221 | 58  | 0.08          |
| Zircon_64 | 21.6  | 4.35  | 0.20 | 0.0699 | 0.0066 | 1.4300 | 0.1400 | 0.1517 | 0.0057 | 0.0484 | 0.0058 | 0.015  | <b>910</b>   | <b>32</b>  | 907  | 61  | 820  | 210 | -0.33         |
| Zircon_65 | 227   | 101.1 | 0.45 | 0.0476 | 0.0097 | 0.0284 | 0.0055 | 0.0047 | 0.0003 | 0.0014 | 0.0003 | -0.042 | <b>30</b>    | <b>1.8</b> | 28.3 | 5.5 | -100 | 370 | -6.01         |
| Zircon_66 | 113.8 | 26.43 | 0.23 | 0.0824 | 0.0032 | 2.4600 | 0.1100 | 0.2189 | 0.0044 | 0.0630 | 0.0034 | 0.218  | <b>1276</b>  | <b>24</b>  | 1260 | 33  | 1238 | 79  | -1.27         |
| Zircon_67 | 53.3  | 34.8  | 0.65 | 0.0529 | 0.0068 | 0.2920 | 0.0360 | 0.0408 | 0.0014 | 0.0121 | 0.0011 | -0.231 | <b>257.7</b> | <b>8.7</b> | 261  | 28  | 350  | 240 | 1.26          |
| Zircon_68 | 111.6 | 103.2 | 0.92 | 0.0516 | 0.0040 | 0.2870 | 0.0220 | 0.0403 | 0.0011 | 0.0136 | 0.0009 | -0.009 | <b>254.4</b> | <b>7.1</b> | 255  | 17  | 240  | 170 | 0.24          |
| Zircon_70 | 508   | 613   | 1.21 | 0.0537 | 0.0026 | 0.2890 | 0.0140 | 0.0399 | 0.0009 | 0.0125 | 0.0006 | 0.03   | <b>252.3</b> | <b>5.4</b> | 258  | 11  | 340  | 110 | 2.21          |
| Zircon_71 | 92.3  | 30    | 0.33 | 0.0752 | 0.0033 | 1.7810 | 0.0920 | 0.1735 | 0.0041 | 0.0553 | 0.0034 | 0.238  | <b>1031</b>  | <b>23</b>  | 1034 | 34  | 1051 | 92  | 0.29          |
| Zircon_72 | 623   | 217   | 0.35 | 0.0856 | 0.0021 | 2.7600 | 0.0930 | 0.2334 | 0.0044 | 0.0697 | 0.0031 | 0.217  | <b>1352</b>  | <b>23</b>  | 1345 | 25  | 1326 | 49  | -0.52         |
| Zircon_73 | 723   | 216.7 | 0.30 | 0.0513 | 0.0043 | 0.0287 | 0.0024 | 0.0041 | 0.0002 | 0.0014 | 0.0002 | 0.249  | <b>26.63</b> | <b>1</b>   | 28.7 | 2.4 | 290  | 170 | 7.21          |
| Zircon_74 | 64.5  | 87.4  | 1.36 | 0.0750 | 0.0240 | 0.3200 | 0.1500 | 0.0304 | 0.0022 | 0.0102 | 0.0020 | 0.068  | <b>193</b>   | <b>13</b>  | 275  | 81  | 1020 | 360 | <b>29.82</b>  |
| Zircon_76 | 176.5 | 44.4  | 0.25 | 0.0727 | 0.0025 | 1.5820 | 0.0650 | 0.1595 | 0.0036 | 0.0504 | 0.0027 | 0.535  | <b>954</b>   | <b>20</b>  | 961  | 26  | 1002 | 73  | 0.73          |
| Zircon_77 | 32.51 | 32.7  | 1.01 | 0.0530 | 0.0100 | 0.2600 | 0.0470 | 0.0360 | 0.0020 | 0.0121 | 0.0013 | 0.09   | <b>228</b>   | <b>13</b>  | 244  | 38  | 310  | 360 | 6.56          |
| Zircon_78 | 269.3 | 268   | 1.00 | 0.0524 | 0.0027 | 0.3090 | 0.0170 | 0.0431 | 0.0011 | 0.0144 | 0.0007 | -0.081 | <b>271.8</b> | <b>6.5</b> | 273  | 13  | 290  | 120 | 0.44          |
| Zircon_80 | 203.7 | 127   | 0.62 | 0.0739 | 0.0025 | 1.8300 | 0.0760 | 0.1821 | 0.0039 | 0.0556 | 0.0025 | 0.249  | <b>1078</b>  | <b>21</b>  | 1055 | 27  | 1029 | 72  | -2.18         |
| Zircon_81 | 234.3 | 313.5 | 1.34 | 0.0507 | 0.0033 | 0.2800 | 0.0180 | 0.0406 | 0.0011 | 0.0123 | 0.0006 | 0.032  | <b>256.5</b> | <b>6.7</b> | 250  | 15  | 210  | 140 | -2.60         |
| Zircon_82 | 144.9 | 84.7  | 0.58 | 0.0511 | 0.0067 | 0.3040 | 0.0380 | 0.0416 | 0.0010 | 0.0134 | 0.0015 | 0.081  | <b>262.7</b> | <b>6.5</b> | 274  | 26  | 260  | 210 | 4.12          |

|            |       |       |      |        |        |        |        |        |        |        |        |        |              |            |       |     |      |     |              |
|------------|-------|-------|------|--------|--------|--------|--------|--------|--------|--------|--------|--------|--------------|------------|-------|-----|------|-----|--------------|
| Zircon_83  | 391   | 313   | 0.80 | 0.0531 | 0.0023 | 0.2930 | 0.0140 | 0.0404 | 0.0008 | 0.0130 | 0.0006 | 0.044  | <b>255.2</b> | <b>5.2</b> | 262   | 12  | 340  | 100 | 2.60         |
| Zircon_84  | 76.1  | 75.1  | 0.99 | 0.0507 | 0.0047 | 0.2600 | 0.0260 | 0.0370 | 0.0013 | 0.0115 | 0.0010 | 0.034  | <b>234.3</b> | <b>7.9</b> | 236   | 21  | 200  | 200 | 0.72         |
| Zircon_85  | 146.8 | 50.1  | 0.34 | 0.0803 | 0.0030 | 2.3000 | 0.1000 | 0.2082 | 0.0044 | 0.0632 | 0.0033 | 0.152  | <b>1219</b>  | <b>24</b>  | 1210  | 31  | 1200 | 76  | -0.74        |
| Zircon_86  | 153.8 | 40.7  | 0.26 | 0.0738 | 0.0026 | 1.6860 | 0.0730 | 0.1653 | 0.0041 | 0.0534 | 0.0029 | 0.373  | <b>986</b>   | <b>23</b>  | 1005  | 27  | 1051 | 71  | 1.89         |
| Zircon_87  | 141   | 140   | 0.99 | 0.0566 | 0.0035 | 0.3390 | 0.0250 | 0.0439 | 0.0014 | 0.0146 | 0.0009 | 0.33   | <b>277</b>   | <b>8.4</b> | 298   | 19  | 450  | 140 | 7.05         |
| Zircon_88  | 880   | 600   | 0.68 | 0.0481 | 0.0043 | 0.0320 | 0.0029 | 0.0049 | 0.0002 | 0.0016 | 0.0001 | 0.088  | <b>31.2</b>  | <b>1.1</b> | 32    | 2.8 | 100  | 190 | 2.50         |
| Zircon_89  | 176.6 | 39.4  | 0.22 | 0.0475 | 0.0042 | 0.1270 | 0.0110 | 0.0188 | 0.0006 | 0.0065 | 0.0007 | -0.044 | <b>120</b>   | <b>4.1</b> | 120.8 | 9.9 | 130  | 180 | 0.66         |
| Zircon_90  | 451   | 140   | 0.31 | 0.0514 | 0.0085 | 0.0278 | 0.0042 | 0.0039 | 0.0002 | 0.0013 | 0.0002 | -0.083 | <b>25.4</b>  | <b>1</b>   | 27.7  | 4.2 | 190  | 310 | 8.30         |
| Zircon_91  | 111.6 | 38.4  | 0.34 | 0.0768 | 0.0026 | 2.0010 | 0.0850 | 0.1894 | 0.0042 | 0.0616 | 0.0034 | 0.412  | <b>1118</b>  | <b>23</b>  | 1114  | 30  | 1115 | 68  | -0.36        |
| Zircon_92  | 177.5 | 100.1 | 0.56 | 0.0928 | 0.0028 | 3.2300 | 0.1200 | 0.2548 | 0.0053 | 0.0773 | 0.0036 | 0.425  | <b>1463</b>  | <b>27</b>  | 1468  | 31  | 1477 | 57  | 0.34         |
| Zircon_93  | 139   | 198.6 | 1.43 | 0.0499 | 0.0034 | 0.2770 | 0.0190 | 0.0408 | 0.0012 | 0.0126 | 0.0006 | -0.007 | <b>257.9</b> | <b>7.5</b> | 250   | 15  | 170  | 150 | -3.16        |
| Zircon_94  | 181.3 | 130.6 | 0.72 | 0.0588 | 0.0092 | 0.0445 | 0.0075 | 0.0055 | 0.0003 | 0.0021 | 0.0002 | -0.244 | <b>35.5</b>  | <b>1.7</b> | 44    | 7.3 | 500  | 330 | <b>19.32</b> |
| Zircon_95  | 243.3 | 129.7 | 0.53 | 0.0529 | 0.0030 | 0.3000 | 0.0170 | 0.0417 | 0.0009 | 0.0132 | 0.0008 | -0.147 | <b>263.6</b> | <b>5.8</b> | 268   | 13  | 290  | 130 | 1.64         |
| Zircon_96  | 281.1 | 177.8 | 0.63 | 0.0594 | 0.0031 | 0.3300 | 0.0190 | 0.0405 | 0.0010 | 0.0142 | 0.0008 | 0.258  | <b>255.7</b> | <b>5.9</b> | 289   | 15  | 580  | 120 | <b>11.52</b> |
| Zircon_97  | 187.4 | 70.1  | 0.37 | 0.0498 | 0.0096 | 0.0315 | 0.0061 | 0.0046 | 0.0003 | 0.0019 | 0.0003 | 0.003  | <b>29.5</b>  | <b>1.6</b> | 32.5  | 6.3 | 270  | 360 | 9.23         |
| Zircon_98  | 187   | 181   | 0.97 | 0.0539 | 0.0036 | 0.2970 | 0.0210 | 0.0400 | 0.0011 | 0.0129 | 0.0007 | 0.285  | <b>252.9</b> | <b>6.6</b> | 266   | 16  | 340  | 140 | 4.92         |
| Zircon_99  | 39.5  | 16.25 | 0.41 | 0.0740 | 0.0039 | 1.7770 | 0.0930 | 0.1734 | 0.0038 | 0.0545 | 0.0036 | -0.166 | <b>1031</b>  | <b>21</b>  | 1038  | 35  | 1070 | 100 | 0.67         |
| Zircon_100 | 374   | 517   | 1.38 | 0.0532 | 0.0025 | 0.2570 | 0.0130 | 0.0356 | 0.0008 | 0.0113 | 0.0005 | 0.216  | <b>225.5</b> | <b>4.7</b> | 234   | 10  | 310  | 110 | 3.63         |

**X**  
**CP17/2-110**    **409321**

**Y**  
**1944696**

| CORRECTED RATIOS <sup>2</sup> |                      |                       |      |                                      |         |                                     |         |                                     |         |                                      |         |        | CORRECTED AGES (Ma)                 |            |                                     |     |                                      |     |        |
|-------------------------------|----------------------|-----------------------|------|--------------------------------------|---------|-------------------------------------|---------|-------------------------------------|---------|--------------------------------------|---------|--------|-------------------------------------|------------|-------------------------------------|-----|--------------------------------------|-----|--------|
|                               | U (ppm) <sup>1</sup> | Th (ppm) <sup>1</sup> | Th/U | <sup>207</sup> Pb/ <sup>206</sup> Pb | ±2s abs | <sup>207</sup> Pb/ <sup>235</sup> U | ±2s abs | <sup>206</sup> Pb/ <sup>238</sup> U | ±2s abs | <sup>208</sup> Pb/ <sup>232</sup> Th | ±2s abs | Rho    | <sup>206</sup> Pb/ <sup>238</sup> U | ±2s        | <sup>207</sup> Pb/ <sup>235</sup> U | ±2s | <sup>207</sup> Pb/ <sup>206</sup> Pb | ±2s | Disc%  |
| Zircon_01_110                 | 151.5                | 70.2                  | 0.46 | 0.0793                               | 0.0042  | 2.1900                              | 0.1100  | 0.1980                              | 0.0036  | 0.0592                               | 0.0034  | 0.239  | <b>1164</b>                         | <b>18</b>  | 1184                                | 34  | 1180                                 | 100 | 1.689  |
| Zircon_02                     | 168.6                | 55.2                  | 0.33 | 0.0713                               | 0.0039  | 1.6140                              | 0.0840  | 0.1633                              | 0.0029  | 0.0510                               | 0.0032  | 0.021  | <b>975</b>                          | <b>16</b>  | 974                                 | 32  | 950                                  | 110 | -0.103 |
| Zircon_03                     | 217.8                | 207                   | 0.95 | 0.0558                               | 0.0046  | 0.3190                              | 0.0260  | 0.0416                              | 0.0009  | 0.0128                               | 0.0009  | 0.009  | <b>262.4</b>                        | <b>5.6</b> | 284                                 | 19  | 380                                  | 170 | 7.606  |
| Zircon_04                     | 44                   | 17.56                 | 0.40 | 0.0719                               | 0.0051  | 1.7700                              | 0.1200  | 0.1731                              | 0.0042  | 0.0558                               | 0.0044  | 0.146  | <b>1029</b>                         | <b>23</b>  | 1032                                | 45  | 980                                  | 140 | 0.291  |
| Zircon_05                     | 82                   | 28.42                 | 0.35 | 0.0490                               | 0.0100  | 0.1200                              | 0.0230  | 0.0169                              | 0.0006  | 0.0061                               | 0.0007  | -0.026 | <b>108</b>                          | <b>3.9</b> | 112                                 | 20  | 120                                  | 340 | 3.571  |
| Zircon_07                     | 252.2                | 73.3                  | 0.29 | 0.0716                               | 0.0037  | 1.6840                              | 0.0830  | 0.1678                              | 0.0030  | 0.0500                               | 0.0029  | 0.208  | <b>1000</b>                         | <b>16</b>  | 1002                                | 32  | 970                                  | 110 | 0.2    |
| Zircon_08                     | 437                  | 91.8                  | 0.21 | 0.0503                               | 0.0035  | 0.1950                              | 0.0140  | 0.0277                              | 0.0006  | 0.0097                               | 0.0008  | 0.372  | <b>176.4</b>                        | <b>3.4</b> | 180                                 | 12  | 200                                  | 150 | 2      |
| Zircon_09                     | 107                  | 30.4                  | 0.28 | 0.0500                               | 0.0190  | 0.0300                              | 0.0120  | 0.0046                              | 0.0004  | 0.0024                               | 0.0006  | -0.191 | <b>29.5</b>                         | <b>2.2</b> | 30                                  | 12  | -50                                  | 600 | 1.667  |
| Zircon_10                     | 246.5                | 262.3                 | 1.06 | 0.0499                               | 0.0037  | 0.2800                              | 0.0200  | 0.0402                              | 0.0009  | 0.0129                               | 0.0008  | -0.028 | <b>254.2</b>                        | <b>5.7</b> | 250                                 | 16  | 190                                  | 160 | -1.68  |
| Zircon_11                     | 759                  | 441                   | 0.58 | 0.0532                               | 0.0064  | 0.0347                              | 0.0037  | 0.0051                              | 0.0002  | 0.0019                               | 0.0002  | 0.572  | <b>32.4</b>                         | <b>1</b>   | 34.5                                | 3.6 | 290                                  | 230 | 6.087  |
| Zircon_12                     | 183                  | 160.6                 | 0.88 | 0.0532                               | 0.0039  | 0.3100                              | 0.0230  | 0.0402                              | 0.0011  | 0.0131                               | 0.0010  | -0.033 | <b>254</b>                          | <b>6.6</b> | 273                                 | 18  | 360                                  | 140 | 6.96   |
| Zircon_13                     | 206.7                | 170.8                 | 0.83 | 0.0530                               | 0.0130  | 0.0352                              | 0.0076  | 0.0048                              | 0.0003  | 0.0013                               | 0.0002  | 0.012  | <b>30.6</b>                         | <b>1.7</b> | 34.9                                | 7.4 | 110                                  | 410 | 12.32  |
| Zircon_14                     | 406                  | 204.7                 | 0.50 | 0.0900                               | 0.0044  | 3.2100                              | 0.1500  | 0.2542                              | 0.0041  | 0.0723                               | 0.0041  | 0.33   | <b>1460</b>                         | <b>21</b>  | 1459                                | 37  | 1422                                 | 92  | -0.069 |
| Zircon_16                     | 267.5                | 133.9                 | 0.50 | 0.0699                               | 0.0037  | 1.5390                              | 0.0780  | 0.1584                              | 0.0028  | 0.0487                               | 0.0027  | 0.184  | <b>948</b>                          | <b>16</b>  | 947                                 | 31  | 920                                  | 110 | -0.106 |
| Zircon_17                     | 211                  | 221                   | 1.05 | 0.0525                               | 0.0042  | 0.2910                              | 0.0240  | 0.0412                              | 0.0011  | 0.0137                               | 0.0008  | 0.374  | <b>260.5</b>                        | <b>7.1</b> | 260                                 | 18  | 260                                  | 170 | -0.192 |
| Zircon_18                     | 185                  | 147.9                 | 0.80 | 0.0543                               | 0.0041  | 0.3130                              | 0.0210  | 0.0415                              | 0.0010  | 0.0125                               | 0.0009  | -0.214 | <b>262</b>                          | <b>6</b>   | 276                                 | 16  | 370                                  | 170 | 5.072  |
| Zircon_19                     | 206.4                | 61.8                  | 0.30 | 0.0723                               | 0.0039  | 1.7210                              | 0.0860  | 0.1721                              | 0.0032  | 0.0523                               | 0.0033  | -0.034 | <b>1024</b>                         | <b>17</b>  | 1015                                | 32  | 990                                  | 110 | -0.887 |
| Zircon_20                     | 232.8                | 86.6                  | 0.37 | 0.0532                               | 0.0048  | 0.2120                              | 0.0180  | 0.0292                              | 0.0006  | 0.0106                               | 0.0009  | -0.286 | <b>185.4</b>                        | <b>3.8</b> | 194                                 | 15  | 270                                  | 170 | 4.433  |

|           |       |       |      |        |        |        |        |        |        |        |        |        |               |             |        |      |               |              |              |
|-----------|-------|-------|------|--------|--------|--------|--------|--------|--------|--------|--------|--------|---------------|-------------|--------|------|---------------|--------------|--------------|
| Zircon_21 | 196.4 | 145.6 | 0.74 | 0.0495 | 0.0040 | 0.2770 | 0.0220 | 0.0406 | 0.0011 | 0.0126 | 0.0009 | -0.007 | <b>257.6</b>  | <b>6.8</b>  | 247    | 17   | 140           | 160          | -4.291       |
| Zircon_22 | 581   | 292.3 | 0.50 | 0.0497 | 0.0057 | 0.0328 | 0.0035 | 0.0048 | 0.0002 | 0.0016 | 0.0001 | -0.142 | <b>30.8</b>   | <b>1</b>    | 32.7   | 3.5  | 170           | 240          | 5.81         |
| Zircon_23 | 118.4 | 190   | 1.60 | 0.0516 | 0.0051 | 0.2460 | 0.0210 | 0.0356 | 0.0010 | 0.0111 | 0.0007 | -0.073 | <b>225.3</b>  | <b>5.9</b>  | 225    | 19   | 230           | 210          | -0.133       |
| Zircon_24 | 249.8 | 212.6 | 0.85 | 0.0441 | 0.0098 | 0.0288 | 0.0063 | 0.0050 | 0.0003 | 0.0015 | 0.0002 | 0.125  | <b>32.2</b>   | <b>1.8</b>  | 28.6   | 6.2  | -230          | 370          | -12.59       |
| Zircon_25 | 340   | 233   | 0.69 | 0.0506 | 0.0032 | 0.2870 | 0.0170 | 0.0416 | 0.0008 | 0.0133 | 0.0008 | 0.066  | <b>262.8</b>  | <b>5</b>    | 256    | 13   | 250           | 140          | -2.656       |
| Zircon_26 | 353   | 257   | 0.73 | 0.0499 | 0.0053 | 0.0871 | 0.0094 | 0.0128 | 0.0004 | 0.0041 | 0.0003 | 0.249  | <b>81.8</b>   | <b>2.3</b>  | 84.5   | 8.8  | 160           | 220          | 3.195        |
| Zircon_27 | 249.6 | 60.8  | 0.24 | 0.0799 | 0.0041 | 2.1700 | 0.1100 | 0.1994 | 0.0034 | 0.0605 | 0.0036 | 0.131  | <b>1172</b>   | <b>18</b>   | 1176   | 33   | 1188          | 99           | 0.34         |
| Zircon_28 | 670   | 252.1 | 0.38 | 0.0473 | 0.0061 | 0.0317 | 0.0042 | 0.0049 | 0.0002 | 0.0017 | 0.0002 | 0.09   | <b>31.3</b>   | <b>1.1</b>  | 31.6   | 4.1  | 40            | 260          | 0.949        |
| Zircon_29 | 193.2 | 106.8 | 0.55 | 0.0530 | 0.0210 | 0.0330 | 0.0110 | 0.0044 | 0.0003 | 0.0014 | 0.0003 | 0.13   | <b>28.1</b>   | <b>1.9</b>  | 34     | 11   | 90            | 520          | <b>17.35</b> |
| Zircon_30 | 417   | 363.9 | 0.87 | 0.0508 | 0.0031 | 0.2880 | 0.0170 | 0.0408 | 0.0012 | 0.0121 | 0.0007 | 0.322  | <b>257.5</b>  | <b>7.1</b>  | 257    | 13   | 230           | 140          | -0.195       |
| Zircon_31 | 202.7 | 104.3 | 0.51 | 0.0490 | 0.0110 | 0.0315 | 0.0070 | 0.0048 | 0.0003 | 0.0014 | 0.0002 | 0.063  | <b>30.6</b>   | <b>1.7</b>  | 31.2   | 6.9  | 50            | 400          | 1.923        |
| Zircon_32 | 108.8 | 49.9  | 0.46 | 0.0712 | 0.0040 | 1.3920 | 0.0760 | 0.1449 | 0.0028 | 0.0463 | 0.0026 | 0.435  | <b>872</b>    | <b>16</b>   | 889    | 31   | 950           | 120          | 1.912        |
| Zircon_33 | 254   | 193   | 0.76 | 0.0620 | 0.0120 | 0.0311 | 0.0049 | 0.0042 | 0.0003 | 0.0015 | 0.0002 | -0.183 | <b>26.9</b>   | <b>1.7</b>  | 32.2   | 4.8  | 520           | 340          | <b>16.46</b> |
| Zircon_34 | 261.1 | 190.4 | 0.73 | 0.0523 | 0.0035 | 0.2790 | 0.0180 | 0.0401 | 0.0008 | 0.0120 | 0.0008 | 0.05   | <b>253.7</b>  | <b>5.1</b>  | 251.0  | 14.0 | 290.0         | 150.0        | -1.076       |
| Zircon_35 | 112   | 90.5  | 0.81 | 0.0758 | 0.0043 | 1.4040 | 0.0820 | 0.1373 | 0.0032 | 0.0468 | 0.0027 | 0.41   | <b>829.0</b>  | <b>18.0</b> | 893.0  | 34.0 | 1080.0        | 120.0        | 7.167        |
| Zircon_36 | 178.7 | 127.6 | 0.71 | 0.0507 | 0.0038 | 0.2780 | 0.0190 | 0.0401 | 0.0009 | 0.0128 | 0.0008 | -0.14  | <b>253.2</b>  | <b>5.6</b>  | 248.0  | 15.0 | 210.0         | 160.0        | -2.097       |
| Zircon_37 | 46.08 | 35.89 | 0.78 | 0.0698 | 0.0051 | 1.4900 | 0.1100 | 0.1524 | 0.0042 | 0.0463 | 0.0031 | -0.10  | <b>914.0</b>  | <b>24.0</b> | 927.0  | 42.0 | 1000.0        | 160.0        | 1.402        |
| Zircon_39 | 123.4 | 82.7  | 0.67 | 0.0533 | 0.0050 | 0.2960 | 0.0270 | 0.0409 | 0.0011 | 0.0137 | 0.0010 | 0.13   | <b>258.3</b>  | <b>7.0</b>  | 261.0  | 21.0 | 280.0         | 190.0        | 1.034        |
| Zircon_40 | 101.2 | 74.4  | 0.74 | 0.0527 | 0.0069 | 0.1020 | 0.0120 | 0.0146 | 0.0006 | 0.0047 | 0.0005 | 0.26   | <b>93.6</b>   | <b>4.0</b>  | 98.0   | 11.0 | 200.0         | 260.0        | 4.49         |
| Zircon_41 | 800   | 219   | 0.27 | 0.0792 | 0.0038 | 2.0740 | 0.0960 | 0.1922 | 0.0028 | 0.0564 | 0.0031 | 0.26   | <b>1133.0</b> | <b>15.0</b> | 1140.0 | 32.0 | 1180.0        | 100.0        | 0.614        |
| Zircon_42 | 142.9 | 118.7 | 0.83 | 0.0495 | 0.0051 | 0.2490 | 0.0260 | 0.0370 | 0.0010 | 0.0122 | 0.0008 | -0.16  | <b>233.9</b>  | <b>6.1</b>  | 224.0  | 21.0 | 120.0         | 200.0        | -4.42        |
| Zircon_43 | 113.5 | 124   | 1.09 | 0.0584 | 0.0084 | 0.3050 | 0.0470 | 0.0399 | 0.0013 | 0.0125 | 0.0010 | 0.04   | <b>252.4</b>  | <b>8.3</b>  | 271.0  | 35.0 | 440.0         | 280.0        | 6.863        |
| Zircon_44 | 58.5  | 41.5  | 0.71 | 0.0806 | 0.0051 | 2.1800 | 0.1300 | 0.2009 | 0.0041 | 0.0604 | 0.0039 | -0.01  | <b>1180.0</b> | <b>22.0</b> | 1169.0 | 44.0 | 1180.0        | 130.0        | -0.941       |
| Zircon_45 | 133.1 | 125.7 | 0.94 | 0.0552 | 0.0051 | 0.3070 | 0.0270 | 0.0404 | 0.0010 | 0.0129 | 0.0008 | -0.02  | <b>255.3</b>  | <b>6.3</b>  | 273.0  | 22.0 | 430.0         | 190.0        | 6.484        |
| Zircon_46 | 174.2 | 188.1 | 1.08 | 0.0513 | 0.0046 | 0.2560 | 0.0220 | 0.0374 | 0.0010 | 0.0122 | 0.0008 | 0.00   | <b>236.7</b>  | <b>6.0</b>  | 230.0  | 17.0 | 210.0         | 190.0        | -2.913       |
| Zircon_47 | 64.2  | 20.52 | 0.32 | 0.0926 | 0.0054 | 3.1700 | 0.1700 | 0.2509 | 0.0048 | 0.0728 | 0.0051 | 0.12   | <b>1443.0</b> | <b>25.0</b> | 1446.0 | 41.0 | 1460.0        | 110.0        | 0.207        |
| Zircon_48 | 64.1  | 56.8  | 0.89 | 0.0834 | 0.0046 | 2.5000 | 0.1500 | 0.2196 | 0.0039 | 0.0660 | 0.0040 | 0.40   | <b>1280.0</b> | <b>21.0</b> | 1277.0 | 45.0 | 1290.0        | 120.0        | -0.235       |
| Zircon_49 | 487   | 257   | 0.53 | 0.1037 | 0.0050 | 4.1100 | 0.2000 | 0.2931 | 0.0053 | 0.1240 | 0.0130 | 0.59   | <b>1656.0</b> | <b>26.0</b> | 1656.0 | 39.0 | 1688.0        | 91.0         | 0            |
| Zircon_50 | 74    | 62.5  | 0.84 | 0.0581 | 0.0065 | 0.2920 | 0.0380 | 0.0399 | 0.0015 | 0.0135 | 0.0009 | 0.38   | <b>252.1</b>  | <b>9.3</b>  | 272.0  | 29.0 | 600.0         | 220.0        | 7.316        |
| Zircon_51 | 202.2 | 58.5  | 0.29 | 0.0725 | 0.0041 | 1.6820 | 0.0920 | 0.1692 | 0.0033 | 0.0522 | 0.0032 | 0.19   | <b>1008.0</b> | <b>18.0</b> | 1000.0 | 35.0 | 1020.0        | 120.0        | -0.8         |
| Zircon_52 | 133.6 | 88.6  | 0.66 | 0.0714 | 0.0046 | 1.3820 | 0.0890 | 0.1409 | 0.0035 | 0.0419 | 0.0026 | 0.07   | <b>850.0</b>  | <b>20.0</b> | 878.0  | 36.0 | 980.0         | 120.0        | 3.189        |
| Zircon_53 | 156.1 | 118.6 | 0.76 | 0.0541 | 0.0046 | 0.2960 | 0.0230 | 0.0410 | 0.0010 | 0.0126 | 0.0009 | -0.11  | <b>259.3</b>  | <b>6.1</b>  | 269.0  | 18.0 | 350.0         | 180.0        | 3.606        |
| Zircon_54 | 1160  | 176.1 | 0.15 | 0.0746 | 0.0039 | 1.6800 | 0.1000 | 0.1650 | 0.0037 | 0.0503 | 0.0033 | 0.16   | <b>985.0</b>  | <b>20.0</b> | 1000.0 | 36.0 | 1053.0        | 94.0         | 1.5          |
| Zircon_55 | 28.55 | 12.22 | 0.43 | 0.0801 | 0.0059 | 1.8200 | 0.1300 | 0.1709 | 0.0043 | 0.0536 | 0.0042 | 0.21   | <b>1017.0</b> | <b>24.0</b> | 1062.0 | 46.0 | 1170.0        | 150.0        | 4.237        |
| Zircon_56 | 96    | 13.4  | 0.14 | 0.0614 | 0.0047 | 0.8020 | 0.0730 | 0.0969 | 0.0024 | 0.0332 | 0.0026 | 0.01   | <b>596.0</b>  | <b>14.0</b> | 596.0  | 35.0 | 660.0         | 130.0        | 0            |
| Zircon_57 | 371.6 | 188.6 | 0.51 | 0.0489 | 0.0080 | 0.0320 | 0.0046 | 0.0047 | 0.0002 | 0.0014 | 0.0002 | 0.03   | <b>30.5</b>   | <b>1.4</b>  | 31.9   | 4.5  | 150.0         | 290.0        | 4.389        |
| Zircon_58 | 49.2  | 71.1  | 1.45 | 0.1090 | 0.0058 | 4.6800 | 0.2400 | 0.3153 | 0.0062 | 0.0917 | 0.0052 | 0.16   | 1766.0        | 30.0        | 1762.0 | 43.0 | <b>1800.0</b> | <b>100.0</b> | -0.227       |
| Zircon_60 | 1256  | 625   | 0.50 | 0.0477 | 0.0046 | 0.0273 | 0.0027 | 0.0043 | 0.0001 | 0.0013 | 0.0001 | 0.35   | <b>27.5</b>   | <b>0.7</b>  | 27.3   | 2.7  | 90.0          | 190.0        | -0.623       |
| Zircon_61 | 198   | 228   | 1.15 | 0.0537 | 0.0069 | 0.2870 | 0.0420 | 0.0387 | 0.0016 | 0.0117 | 0.0012 | 0.17   | <b>244.8</b>  | <b>9.9</b>  | 255.0  | 32.0 | 330.0         | 210.0        | 4            |
| Zircon_62 | 163.4 | 72.7  | 0.44 | 0.0761 | 0.0039 | 1.8050 | 0.0920 | 0.1752 | 0.0032 | 0.0537 | 0.0030 | 0.40   | <b>1041.0</b> | <b>17.0</b> | 1046.0 | 32.0 | 1099.0        | 96.0         | 0.478        |
| Zircon_64 | 579   | 451.6 | 0.78 | 0.0524 | 0.0029 | 0.2820 | 0.0160 | 0.0393 | 0.0007 | 0.0122 | 0.0007 | 0.18   | <b>248.6</b>  | <b>4.2</b>  | 252.0  | 12.0 | 290.0         | 130.0        | 1.349        |
| Zircon_65 | 520   | 342   | 0.66 | 0.0550 | 0.0034 | 0.3040 | 0.0200 | 0.0414 | 0.0011 | 0.0130 | 0.0010 | 0.11   | <b>261.7</b>  | <b>6.8</b>  | 274.0  | 15.0 | 390.0         | 140.0        | 4.489        |
| Zircon_66 | 1032  | 439   | 0.43 | 0.0630 | 0.0051 | 0.0398 | 0.0031 | 0.0047 | 0.0001 | 0.0018 | 0.0001 | -0.02  | <b>30.0</b>   | <b>0.8</b>  | 39.6   | 3.1  | 650.0         | 170.0        | <b>24.24</b> |
| Zircon_67 | 293.6 | 99.7  | 0.34 | 0.0814 | 0.0040 | 2.3100 | 0.1100 | 0.2081 | 0.0034 | 0.0590 | 0.0033 | 0.29   | <b>1219.0</b> | <b>18.0</b> | 1215.0 | 33.0 | 1226.0        | 97.0         | -0.329       |

|            |       |       |      |        |        |        |        |        |        |        |        |       |               |             |        |      |        |       |              |
|------------|-------|-------|------|--------|--------|--------|--------|--------|--------|--------|--------|-------|---------------|-------------|--------|------|--------|-------|--------------|
| Zircon_68  | 722   | 413   | 0.57 | 0.1157 | 0.0055 | 3.1400 | 0.1900 | 0.1993 | 0.0081 | 0.0661 | 0.0048 | 0.61  | <b>1172.0</b> | <b>43.0</b> | 1447.0 | 47.0 | 1888.0 | 88.0  | 19           |
| Zircon_69  | 279   | 201.2 | 0.72 | 0.0502 | 0.0038 | 0.2780 | 0.0200 | 0.0398 | 0.0008 | 0.0123 | 0.0008 | 0.02  | <b>251.5</b>  | <b>4.8</b>  | 249.0  | 16.0 | 200.0  | 160.0 | -1.004       |
| Zircon_70  | 326.3 | 117.4 | 0.36 | 0.0486 | 0.0041 | 0.1146 | 0.0089 | 0.0172 | 0.0005 | 0.0058 | 0.0005 | -0.03 | <b>109.7</b>  | <b>3.0</b>  | 109.9  | 8.1  | 130.0  | 170.0 | 0.182        |
| Zircon_71  | 124   | 99.4  | 0.80 | 0.0564 | 0.0050 | 0.3210 | 0.0250 | 0.0408 | 0.0011 | 0.0130 | 0.0010 | -0.29 | <b>257.5</b>  | <b>6.8</b>  | 282.0  | 19.0 | 440.0  | 190.0 | 8.688        |
| Zircon_72  | 38.2  | 17.93 | 0.47 | 0.0782 | 0.0063 | 1.7400 | 0.1300 | 0.1640 | 0.0042 | 0.0575 | 0.0051 | -0.34 | <b>986.0</b>  | <b>23.0</b> | 1015.0 | 46.0 | 1120.0 | 140.0 | 2.857        |
| Zircon_73  | 198.8 | 127   | 0.64 | 0.0623 | 0.0037 | 1.0130 | 0.0590 | 0.1186 | 0.0022 | 0.0331 | 0.0020 | 0.14  | <b>722.0</b>  | <b>12.0</b> | 711.0  | 30.0 | 720.0  | 120.0 | -1.547       |
| Zircon_74  | 87.9  | 33.3  | 0.38 | 0.0699 | 0.0042 | 1.4970 | 0.0820 | 0.1565 | 0.0032 | 0.0479 | 0.0031 | 0.06  | <b>937.0</b>  | <b>18.0</b> | 931.0  | 35.0 | 900.0  | 130.0 | -0.644       |
| Zircon_75  | 112.9 | 71.6  | 0.63 | 0.0528 | 0.0046 | 0.2810 | 0.0240 | 0.0401 | 0.0012 | 0.0137 | 0.0010 | 0.01  | <b>253.6</b>  | <b>7.3</b>  | 255.0  | 20.0 | 290.0  | 190.0 | 0.549        |
| Zircon_76  | 108.9 | 28.65 | 0.26 | 0.0749 | 0.0042 | 1.7300 | 0.1100 | 0.1698 | 0.0078 | 0.0549 | 0.0039 | 0.32  | <b>1010.0</b> | <b>44.0</b> | 1018.0 | 41.0 | 1050.0 | 110.0 | 0.786        |
| Zircon_77  | 327   | 191.1 | 0.58 | 0.0520 | 0.0100 | 0.0300 | 0.0062 | 0.0043 | 0.0002 | 0.0013 | 0.0002 | -0.15 | <b>27.9</b>   | <b>1.4</b>  | 29.9   | 6.1  | 100.0  | 370.0 | 6.689        |
| Zircon_78  | 108.9 | 56.7  | 0.52 | 0.0709 | 0.0039 | 1.5960 | 0.0850 | 0.1628 | 0.0028 | 0.0506 | 0.0030 | 0.29  | <b>974.0</b>  | <b>16.0</b> | 967.0  | 33.0 | 950.0  | 110.0 | -0.724       |
| Zircon_79  | 305.3 | 177.6 | 0.58 | 0.0513 | 0.0036 | 0.3200 | 0.0210 | 0.0445 | 0.0010 | 0.0156 | 0.0009 | 0.09  | <b>280.4</b>  | <b>6.0</b>  | 281.0  | 17.0 | 250.0  | 160.0 | 0.214        |
| Zircon_80  | 143.9 | 40    | 0.28 | 0.0801 | 0.0042 | 2.2200 | 0.1100 | 0.2012 | 0.0041 | 0.0614 | 0.0040 | 0.63  | <b>1184.0</b> | <b>22.0</b> | 1187.0 | 38.0 | 1190.0 | 110.0 | 0.253        |
| Zircon_81  | 1062  | 144   | 0.14 | 0.0790 | 0.0038 | 1.8650 | 0.0870 | 0.1703 | 0.0024 | 0.0542 | 0.0029 | 0.07  | <b>1014.0</b> | <b>13.0</b> | 1069.0 | 30.0 | 1168.0 | 96.0  | 5.145        |
| Zircon_82  | 1094  | 550   | 0.50 | 0.0474 | 0.0045 | 0.0319 | 0.0028 | 0.0049 | 0.0001 | 0.0015 | 0.0001 | -0.02 | <b>31.5</b>   | <b>0.8</b>  | 31.8   | 2.7  | 90.0   | 180.0 | 0.881        |
| Zircon_83  | 226.3 | 67.2  | 0.30 | 0.0541 | 0.0033 | 0.5050 | 0.0310 | 0.0664 | 0.0014 | 0.0257 | 0.0016 | 0.06  | <b>415.5</b>  | <b>8.7</b>  | 414.0  | 21.0 | 380.0  | 130.0 | -0.362       |
| Zircon_84  | 41.7  | 14.58 | 0.35 | 0.0666 | 0.0047 | 1.5100 | 0.0950 | 0.1624 | 0.0042 | 0.0486 | 0.0046 | -0.13 | <b>970.0</b>  | <b>22.0</b> | 936.0  | 41.0 | 780.0  | 150.0 | -3.632       |
| Zircon_85  | 233.3 | 191.2 | 0.82 | 0.0498 | 0.0038 | 0.2680 | 0.0180 | 0.0390 | 0.0010 | 0.0123 | 0.0007 | -0.20 | <b>246.7</b>  | <b>6.1</b>  | 240.0  | 14.0 | 160.0  | 160.0 | -2.792       |
| Zircon_86  | 226.2 | 63.8  | 0.28 | 0.0770 | 0.0038 | 2.2000 | 0.1100 | 0.2028 | 0.0032 | 0.0592 | 0.0035 | 0.26  | <b>1190.0</b> | <b>17.0</b> | 1181.0 | 32.0 | 1117.0 | 97.0  | -0.762       |
| Zircon_87  | 1316  | 620   | 0.47 | 0.0458 | 0.0033 | 0.0359 | 0.0024 | 0.0055 | 0.0001 | 0.0016 | 0.0001 | -0.32 | <b>35.3</b>   | <b>0.9</b>  | 35.8   | 2.3  | -10.0  | 150.0 | 1.285        |
| Zircon_88  | 368   | 87    | 0.24 | 0.0714 | 0.0035 | 1.6740 | 0.0810 | 0.1682 | 0.0026 | 0.0494 | 0.0029 | 0.53  | <b>1002.0</b> | <b>15.0</b> | 998.0  | 31.0 | 960.0  | 100.0 | -0.401       |
| Zircon_89  | 62.4  | 37.7  | 0.60 | 0.0770 | 0.0051 | 1.9800 | 0.1200 | 0.1844 | 0.0038 | 0.0541 | 0.0036 | -0.09 | <b>1091.0</b> | <b>21.0</b> | 1106.0 | 41.0 | 1110.0 | 130.0 | 1.356        |
| Zircon_90  | 240   | 177.6 | 0.74 | 0.0420 | 0.0110 | 0.0253 | 0.0061 | 0.0043 | 0.0003 | 0.0015 | 0.0002 | -0.01 | <b>27.7</b>   | <b>1.6</b>  | 25.2   | 6.0  | -120.0 | 440.0 | -9.921       |
| Zircon_92  | 116.4 | 63.2  | 0.54 | 0.0829 | 0.0045 | 2.4900 | 0.1300 | 0.2167 | 0.0041 | 0.0652 | 0.0038 | 0.42  | <b>1264.0</b> | <b>22.0</b> | 1268.0 | 38.0 | 1270.0 | 100.0 | 0.315        |
| Zircon_93  | 41    | 24.1  | 0.59 | 0.0781 | 0.0068 | 1.7800 | 0.1500 | 0.1611 | 0.0045 | 0.0540 | 0.0038 | 0.10  | <b>962.0</b>  | <b>25.0</b> | 1029.0 | 53.0 | 1100.0 | 180.0 | 6.511        |
| Zircon_94  | 182   | 83.9  | 0.46 | 0.0489 | 0.0033 | 0.2830 | 0.0190 | 0.0414 | 0.0010 | 0.0122 | 0.0009 | 0.26  | <b>261.2</b>  | <b>6.4</b>  | 252.0  | 15.0 | 140.0  | 150.0 | -3.651       |
| Zircon_95  | 113.7 | 97.2  | 0.85 | 0.0569 | 0.0075 | 0.1140 | 0.0130 | 0.0142 | 0.0007 | 0.0046 | 0.0004 | -0.04 | <b>90.7</b>   | <b>4.2</b>  | 109.0  | 12.0 | 410.0  | 260.0 | <b>16.79</b> |
| Zircon_96  | 169.8 | 122   | 0.72 | 0.0527 | 0.0048 | 0.2900 | 0.0250 | 0.0394 | 0.0010 | 0.0123 | 0.0008 | -0.15 | <b>249.4</b>  | <b>6.4</b>  | 257.0  | 19.0 | 280.0  | 190.0 | 2.957        |
| Zircon_97  | 89.1  | 112.3 | 1.26 | 0.0587 | 0.0038 | 0.7280 | 0.0450 | 0.0904 | 0.0021 | 0.0273 | 0.0016 | 0.41  | <b>558.0</b>  | <b>12.0</b> | 557.0  | 28.0 | 510.0  | 150.0 | -0.18        |
| Zircon_98  | 25.68 | 27.33 | 1.06 | 0.0690 | 0.0110 | 0.3960 | 0.0650 | 0.0394 | 0.0019 | 0.0128 | 0.0016 | 0.25  | <b>249.0</b>  | <b>12.0</b> | 327.0  | 49.0 | 910.0  | 290.0 | 23.85        |
| Zircon_99  | 447.7 | 45.5  | 0.10 | 0.0677 | 0.0034 | 1.4710 | 0.0740 | 0.1536 | 0.0028 | 0.0447 | 0.0030 | 0.50  | <b>921.0</b>  | <b>16.0</b> | 918.0  | 31.0 | 850.0  | 110.0 | -0.327       |
| Zircon_100 | 265   | 107.1 | 0.40 | 0.0745 | 0.0038 | 1.9500 | 0.1000 | 0.1865 | 0.0029 | 0.0542 | 0.0031 | 0.28  | <b>1102.0</b> | <b>16.0</b> | 1101.0 | 33.0 | 1050.0 | 110.0 | -0.091       |

1: U and Th concentrations are calculated employing an external standard zircon as in Paton et al., 2010, Geochemistry, Geophysics, Geosystems.

2: 2 sigma uncertainties propagated according to Paton et al., 2010, Geochemistry, Geophysics, Geosystems

<sup>207</sup>Pb/<sup>206</sup>Pb ratios, ages and errors are calculated according to Petrus and Kamber, 2012, Geostandards Geoanalytical Research

Analyzed spots were 23 micrometers, using an analytical protocol modified from Solari et al., 2010, Geostandards Geoanalytical Research.

Data measured employing a Thermo iCapQc ICPMS coupled to a Resonetics, Resolution M050 excimer laser workstation.
