# Supplementary material
Source: publisher figshare collection journal article supplement (https://tandf.figshare.com/articles/dataset/_/6388880)
Supplement: Supplementary file 5 [file 1]

## Appendix A. Photomicrographs of benthic and planktonic foraminifera

Sample: **CP17-109**

### Benthic foraminifera

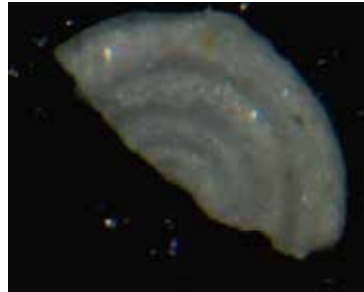

*Amodiscus latus*

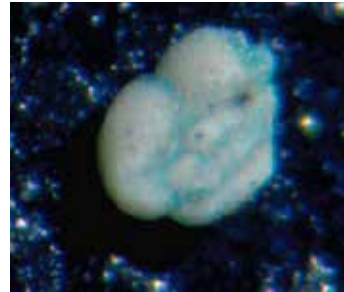

*Anomalinoides semicribatus*

### Planktonic foraminifera

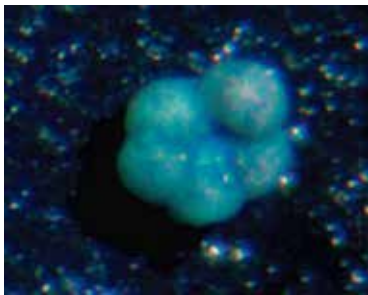

*Globigerina ciperoensis*  
*ciperoensis*

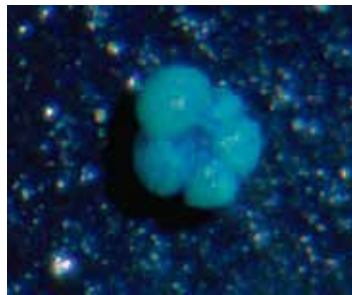

*Globigerina ciperoensis*  
*angulisuturalis*

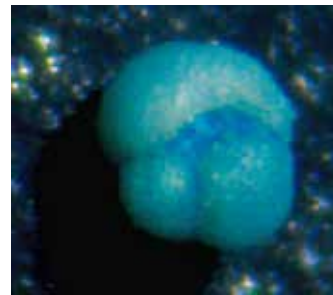

*Globigerina tripartita*

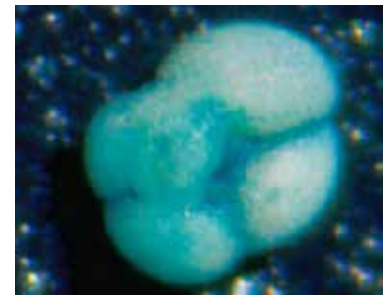

*Catapsydrax dissimilis*

Sample: **CP17-112**

### Benthic foraminifera

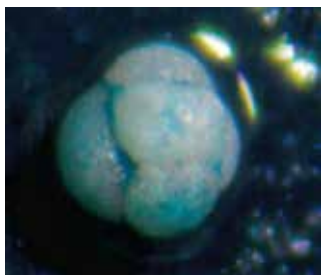

*Catapsydrax dissimilis*

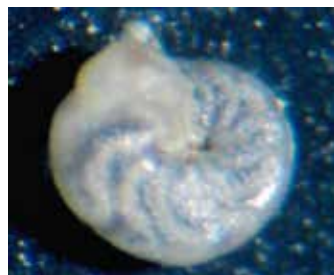

*Discorbinella* sp.

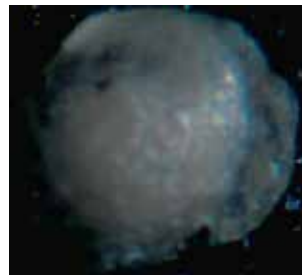

*Osangularia* sp.

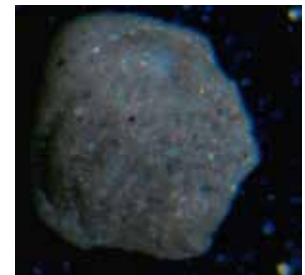

*Spiroplectamina* sp.

### Planktonic foraminifera

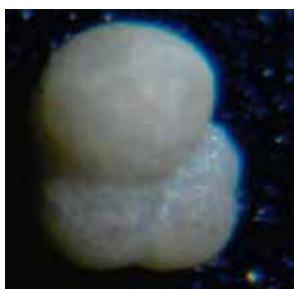

*Globorotalia opima*  
*opima*

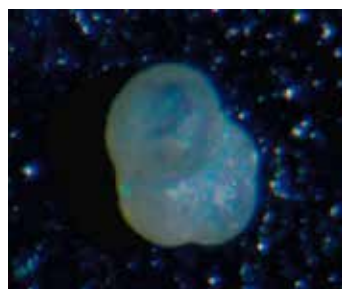

*Globorotalia opima*  
*nana*

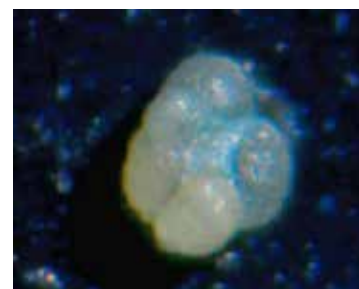

*Globigerina ciperoensis*  
*ciperoensis*
