# Supplementary material
Source: publisher figshare collection journal article supplement (https://tandf.figshare.com/articles/dataset/_/6388880)
Supplement: Supplementary file 6 [file 1]

Tabla B. Continued

| Recalculated parameters |                     |                |                |                 |                   |                 |
|-------------------------|---------------------|----------------|----------------|-----------------|-------------------|-----------------|
| Sample                  | QFL%Q               | QFL%F          | QFL%L          | LmLvLs%Lm       | LmLvLs%Lv         | LmLvLs%Ls       |
| CP17-105                | 37.5                | 25.6           | 36.9           | 54.6            | 25.9              | 19.4            |
| CP17-106                | 36.1                | 31.9           | 31.9           | 61.0            | 18.3              | 20.7            |
| CP17-104                | 37.8                | 28.6           | 33.7           | 67.6            | 17.6              | 14.7            |
| CP17-107                | 36.6                | 39.7           | 23.6           | 67.2            | 19.4              | 13.4            |
| CP17-103                | 40.9                | 23.8           | 35.3           | 57.7            | 33.0              | 9.3             |
| CP17-110                | 44.2                | 25.7           | 30.1           | 69.1            | 16.0              | 14.8            |
| CP17-100                | 40.9                | 23.2           | 35.9           | 71.0            | 22.0              | 7.0             |
| CP17-101                | 36.6                | 23.7           | 39.7           | 66.7            | 24.2              | 9.2             |
| CP17-113                | 34.7                | 25.1           | 40.2           | 65.8            | 25.6              | 8.5             |
| CP17-111                | 37.0                | 26.6           | 36.4           | 73.2            | 19.6              | 7.1             |
| Sample                  | (Lm+Ls)LvLu%(Lm+Ls) | (Lm+Ls)LvLu%Lv | (Lm+Ls)LvLu%Lu | QmKP%Qm         | QmKP%K            | QmKP%P          |
| CP17-105                | 70.2                | 24.6           | 5.3            | 58.4            | 24.2              | 17.4            |
| CP17-106                | 72.8                | 16.3           | 10.9           | 52.3            | 29.0              | 18.7            |
| CP17-104                | 80.6                | 17.3           | 2.2            | 56.6            | 18.0              | 25.4            |
| CP17-107                | 78.3                | 18.8           | 2.9            | 47.5            | 29.0              | 23.5            |
| CP17-103                | 64.0                | 32.0           | 4.0            | 61.8            | 21.9              | 16.3            |
| CP17-110                | 77.3                | 14.8           | 8.0            | 62.1            | 17.2              | 20.7            |
| CP17-100                | 72.9                | 20.6           | 6.5            | 63.1            | 20.9              | 16.0            |
| CP17-101                | 70.5                | 22.5           | 7.0            | 60.5            | 21.5              | 17.9            |
| CP17-113                | 66.9                | 23.1           | 10.0           | 56.9            | 20.7              | 22.3            |
| CP17-111                | 75.6                | 18.5           | 5.9            | 58.2            | 23.1              | 18.8            |
| Sample                  | LmfLmpLmb%Lmf       | LmfLmpLmb%Lmp  | LmfLmpLmb%Lmb  | Lm1Lm2-3Lm4%Lm1 | Lm1Lm2-3Lm4%Lm2-3 | Lm1Lm2-3Lm4%Lm4 |
| CP17-105                | 74.6                | 22.0           | 3.4            | 1.7             | 89.7              | 8.6             |
| CP17-106                | 82.0                | 14.0           | 4.0            | 2.2             | 93.5              | 4.3             |
| CP17-104                | 84.8                | 14.1           | 1.1            | 8.0             | 92.0              | 0.0             |
| CP17-107                | 66.7                | 26.7           | 6.7            | 4.8             | 83.3              | 11.9            |
| CP17-103                | 67.9                | 19.6           | 12.5           | 16.3            | 73.5              | 10.2            |
| CP17-110                | 78.6                | 17.9           | 3.6            | 2.1             | 89.6              | 8.3             |
| CP17-100                | 81.7                | 15.5           | 2.8            | 1.6             | 96.7              | 1.6             |
| CP17-101                | 80.0                | 16.3           | 3.8            | 1.4             | 93.1              | 5.6             |
| CP17-113                | 74.0                | 22.1           | 3.9            | 1.4             | 94.4              | 4.2             |
| CP17-111                | 80.5                | 15.9           | 3.7            | 1.4             | 94.4              | 4.2             |
