# Supplementary material
Source: publisher figshare collection journal article supplement (https://tandf.figshare.com/articles/dataset/_/6388880)
Supplement: Supplementary file 7 [file 1]

**Table A: Framework grain parameters used for sandstones of the Cerro Pelón area**

| Parameters | Definition                                                                                                                        |
|------------|-----------------------------------------------------------------------------------------------------------------------------------|
| Qs         | Single crystal of quartz                                                                                                          |
| QRm        | Quartz in a phaneritic and polycrystalline fragment showing evidence of solid-state deformation                                   |
| QRi        | Quartz in a phaneritic and polycrystalline fragment showing any evidence of solid-state deformation                               |
| QLvf       | Quartz fenocryst (>0.0625 mm in size) in a felsitic volcanic lithic grain                                                         |
| Qp         | Aphanitic and polycrystalline quartz                                                                                              |
| Ks         | Single crystal of K-feldspar                                                                                                      |
| KRm        | K-feldspar in a phaneritic and polycrystalline fragment showing evidence of solid-state deformation                               |
| KRi        | K-feldspar in a phaneritic and polycrystalline fragment showing any evidence of solid-state deformation                           |
| Ps         | Single crystal of plagioclase                                                                                                     |
| PRm        | Plagioclase in a phaneritic and polycrystalline fragment showing evidence of solid-state deformation                              |
| PRi        | Plagioclase in a phaneritic and polycrystalline fragment showing any evidence of solid-state deformation                          |
| PLvl       | Plagioclase fenocryst (>0.0625 mm in size) in a lathwork volcanic lithic grain                                                    |
| Lmf(1-5)   | Metapsammitic/metafelsitic lithic grain (numbers from 1 to 5 indicate metamorphic grades according to Garzanti and Vezzoli, 2003) |
| Lmf?       | Metapsammitic/metafelsitic lithic grain of undetermined metamorphic grade                                                         |
| Lmp(1-5)   | Metapelitic lithic grain (numbers from 1 to 5 indicate metamorphic grades according to Garzanti and Vezzoli, 2003)                |
| Lmb(1-5)   | Metabasitic lithic grain (numbers from 1 to 5 indicate metamorphic grades according to Garzanti and Vezzoli, 2003)                |
| Lvl        | Lathwork volcanic lithic grain                                                                                                    |
| Lvmi       | Microclitic volcanic lithic grain                                                                                                 |
| Lvf        | Felsitic volcanic lithic grain                                                                                                    |
| Lss        | Siliciclastic sedimentary lithic grain                                                                                            |
| Lsc        | Carbonate sedimentary lithic grain                                                                                                |
| Lu         | Ultramafic lithic grain                                                                                                           |
| H          | Translucent heavy minerals                                                                                                        |
| Opaque     | Opaque grains                                                                                                                     |
| Und        | Undifferentiated grains                                                                                                           |
| Qm         | Total monocrystalline quartz (Qs+QRm+QRi+QLvf)                                                                                    |
| Q          | Total quartz (Qm+Qp)                                                                                                              |
| K          | Total K-feldspar (Ks+KRm+KRi)                                                                                                     |
| P          | Total plagioclase (Ps+PRm+PRi+PLvl)                                                                                               |
| F          | Total feldspar (K+P)                                                                                                              |
| Lm         | Total metamorphic lithic grains (Lmf+Lmp+Lmb)                                                                                     |
| Lv         | Total volcanic lithic grains (Lvl+Lvmi+Lvf)                                                                                       |
| Ls         | Total sedimentary lithic grains (Lss+Lsc)                                                                                         |
| L          | Total lithic grains (Lm+Lv+Ls+Lu)                                                                                                 |
